# Supplementary material for: Specific Transfection of Inflamed Brain by Macrophages: A New Therapeutic Strategy for Neurodegenerative Diseases
Source: PLOS journal article supplement (doi:10.1371/journal.pone.0061852), 2013-04-19
Supplement: S1 (10.1371/journal.pone.0061852.s001) [file journal.pone.0061852.s001]

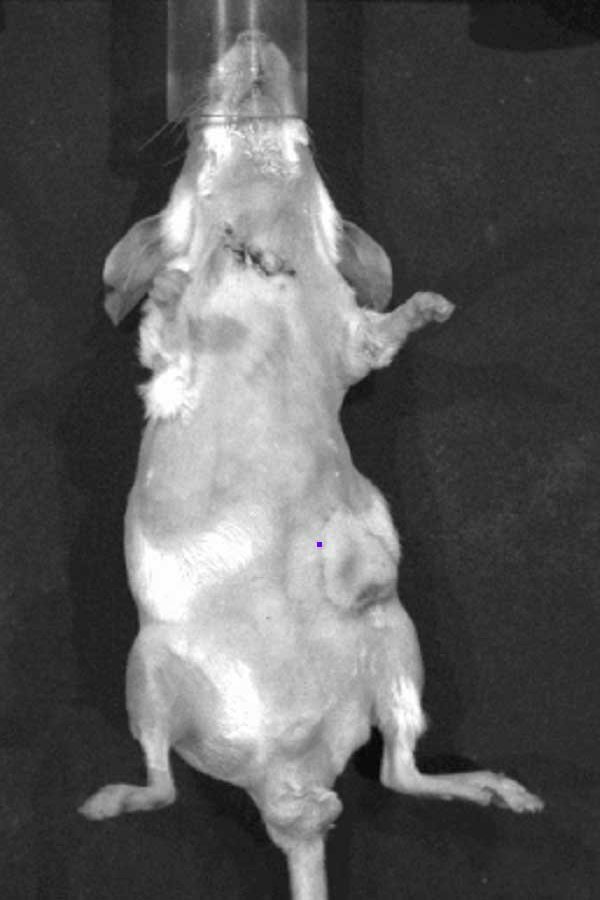

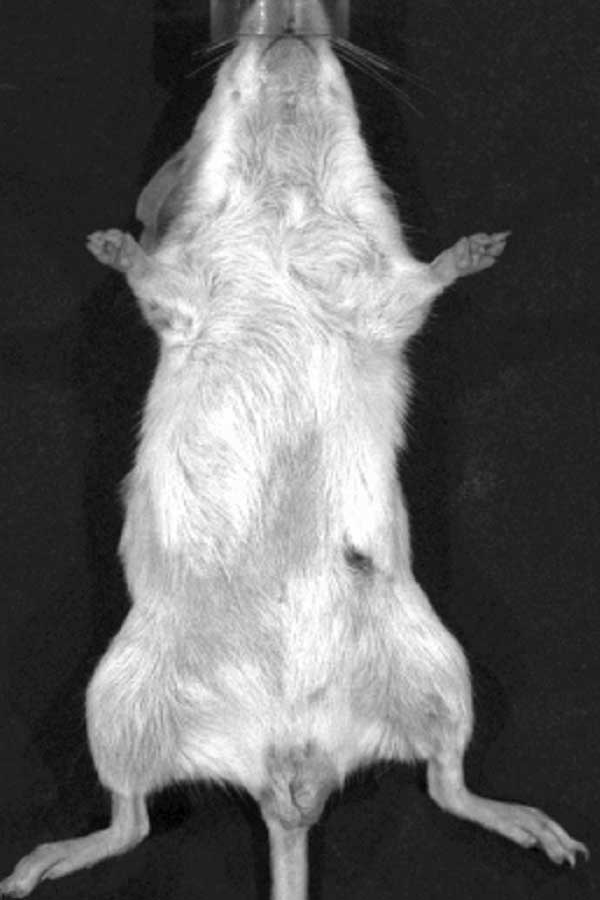

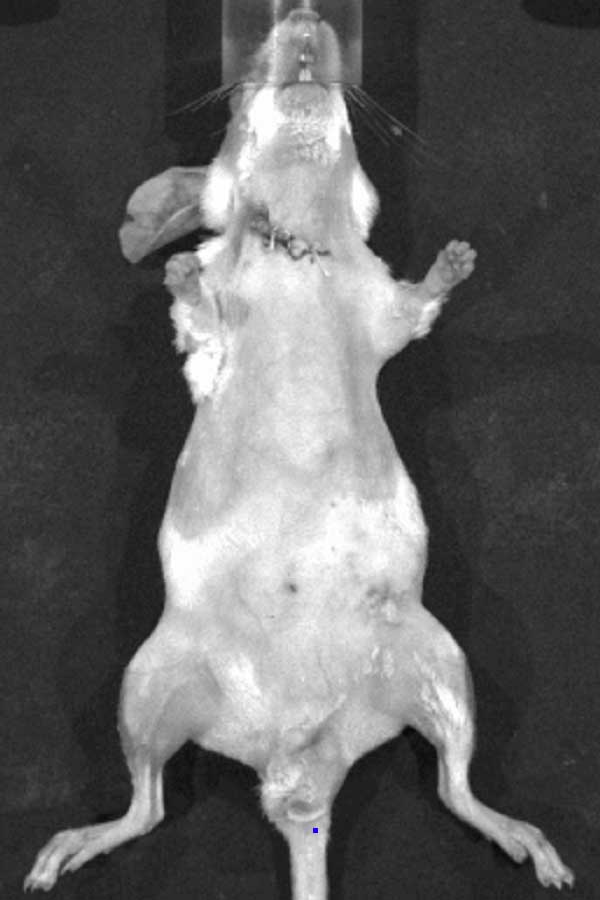


Day 3

Day 5

Day 7

Day 1

Day 2

Day 21 Day 34

Day 3

Day 5

Day 7

Day 1

Day 2

Day 21 Day 34

Mice with brain inflammation

Healthy mice

A

B


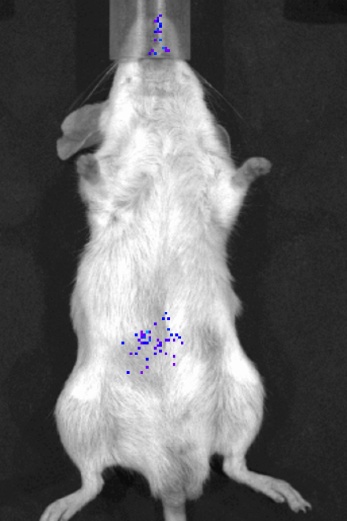

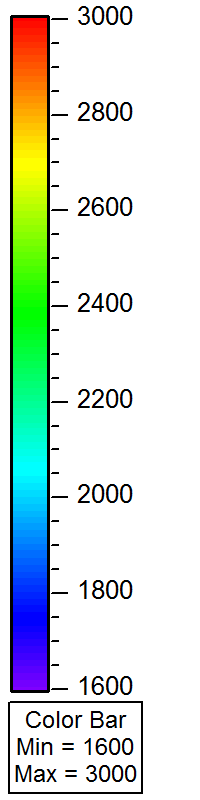

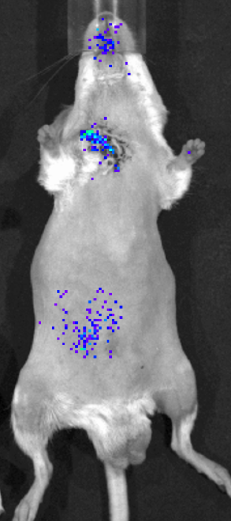

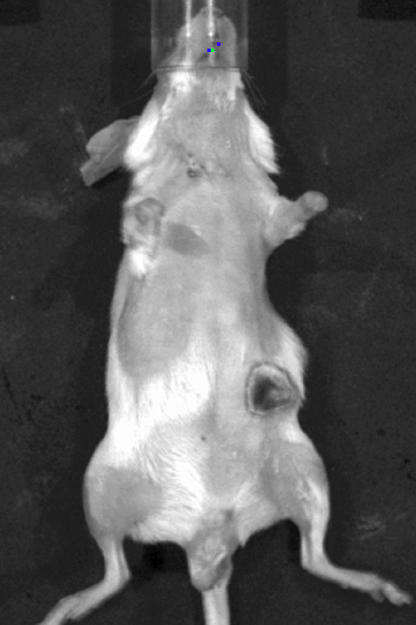

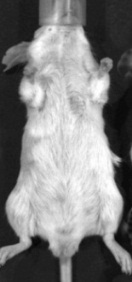

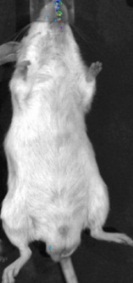

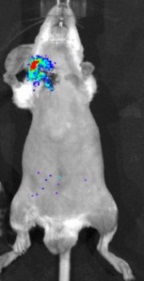

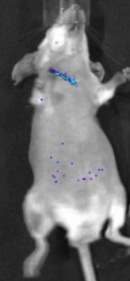

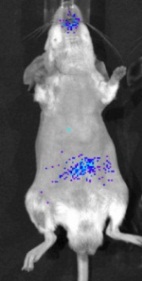

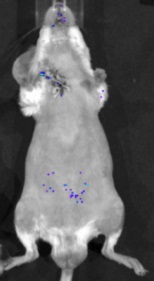

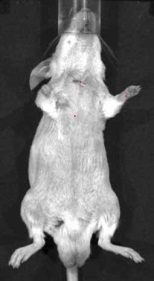

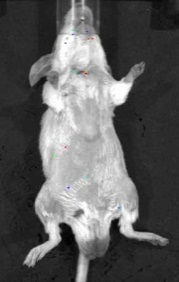


B

**Figure S1. Biodistribution of expressed Luciferase in mice with brain inflammation by IVIS**
