# Supplementary figures and images for: Specific Transfection of Inflamed Brain by Macrophages: A New Therapeutic Strategy for Neurodegenerative Diseases
Source: PLOS journal article supplement (doi:10.1371/journal.pone.0061852), 2013-04-19

A

B

1 day


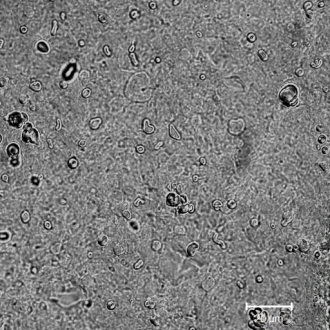


5 days


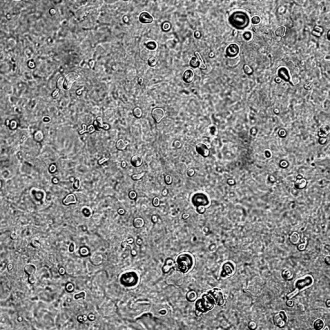


**Figure S3. Tracking of LV-GFPFLuc virus in mice with brain inflammation**

Supplement: S3 (10.1371/journal.pone.0061852.s003) [file journal.pone.0061852.s003]
